# Supplementary material for: Plasma Metabolomics Predicts Chemotherapy Response in Advanced Pancreatic Cancer
Source: MDPI journal article supplement (doi:10.3390/cancers15113020), 2023-06-01

Supplementary Figure S1

A

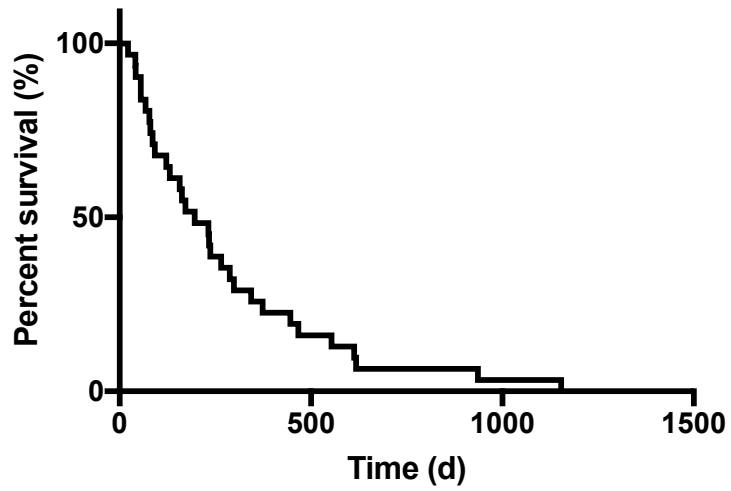

B

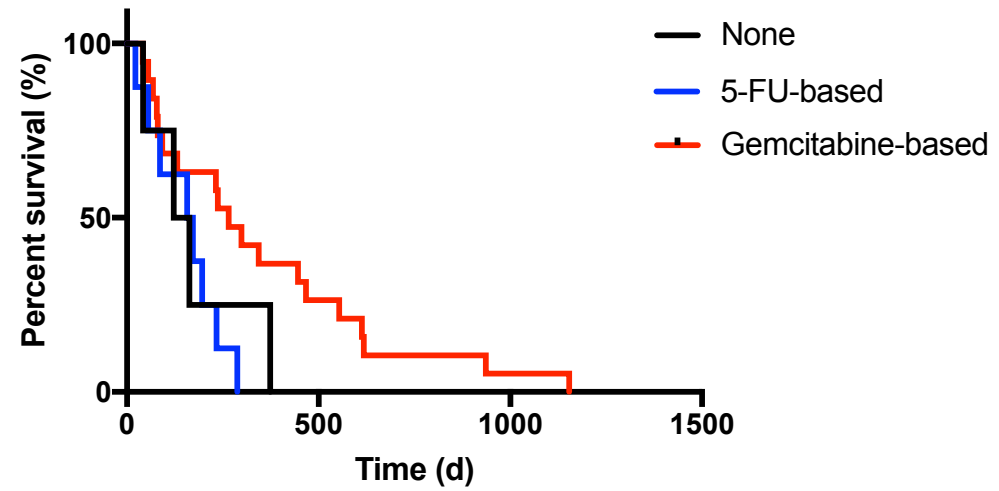

# Supplementary Figure S2

**A** Pretreatment

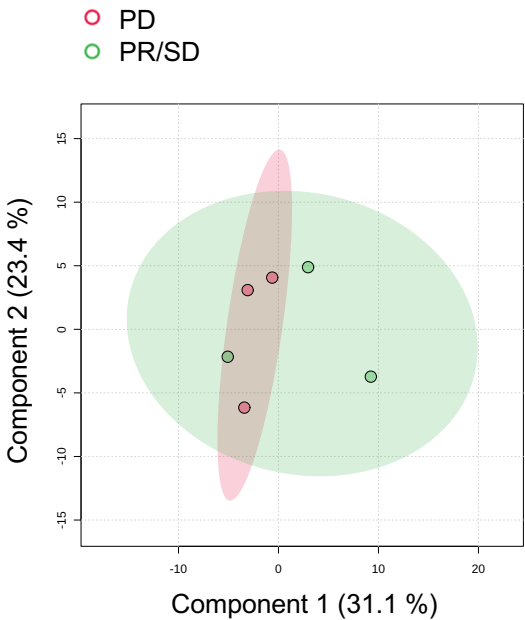

**B** FOLFIRINOX or FOLFIRI

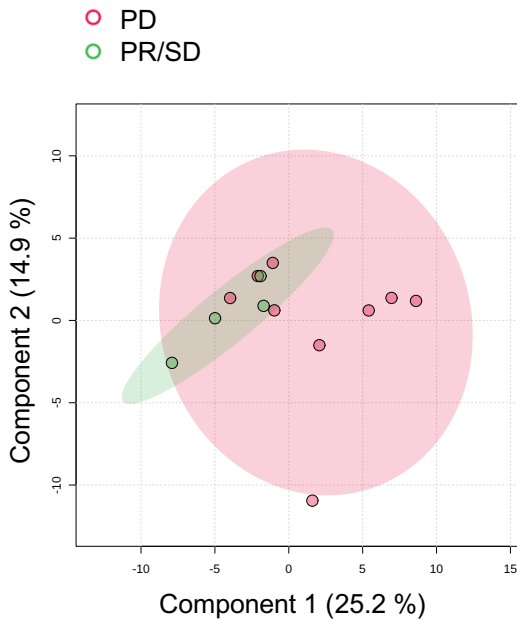

**C** Gemcitabine + abraxane

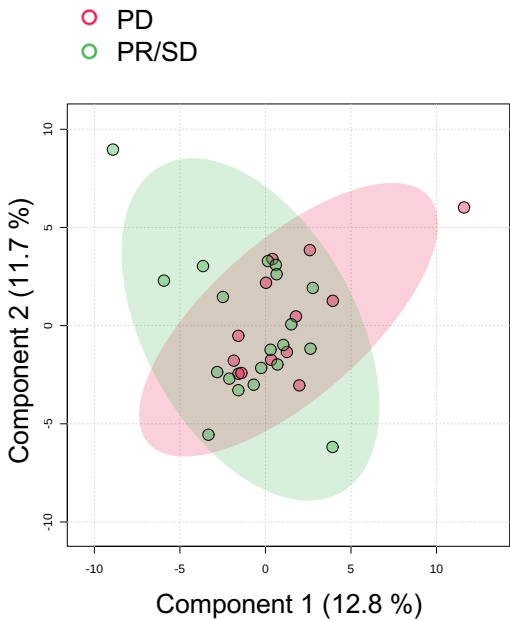

# Supplementary Figure S3

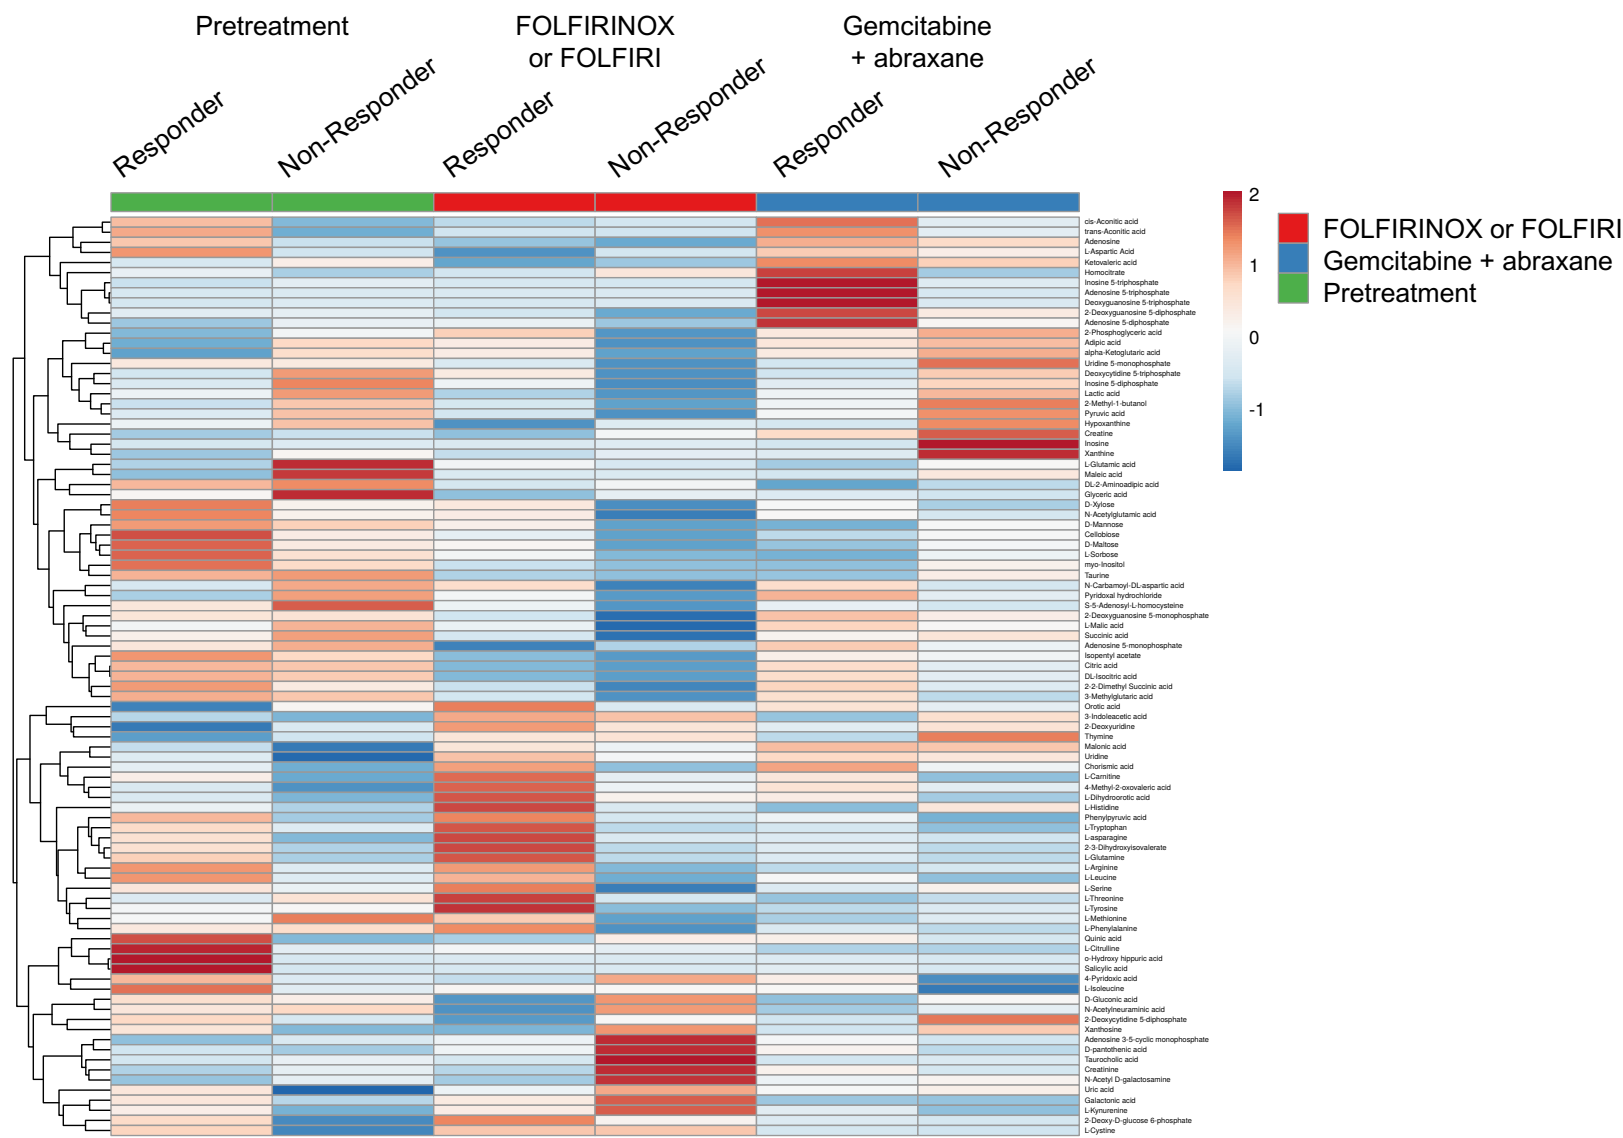

# Supplementary Figure S4

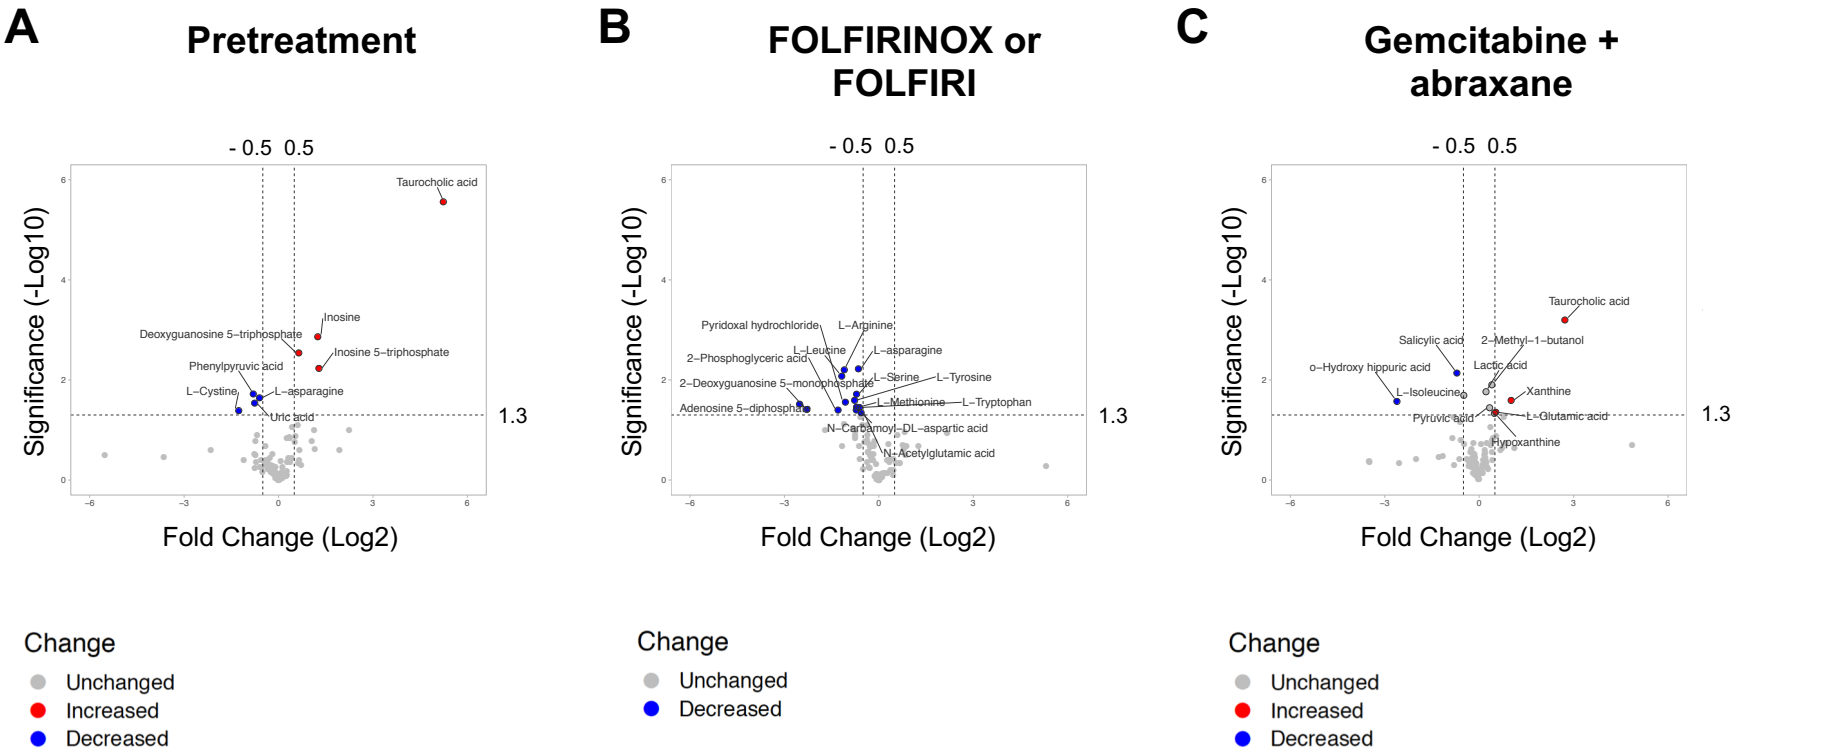

Supplement: s1 [file s1]
